# Supplementary material for: Context-dependent role for chromatin remodeling component PBRM1/BAF180 in clear cell renal cell carcinoma
Source: PubMed Central journal article supplement (PMC5294252; doi:10.1038/oncsis.2016.89), 2017-01-16

Supplemental Fig.2

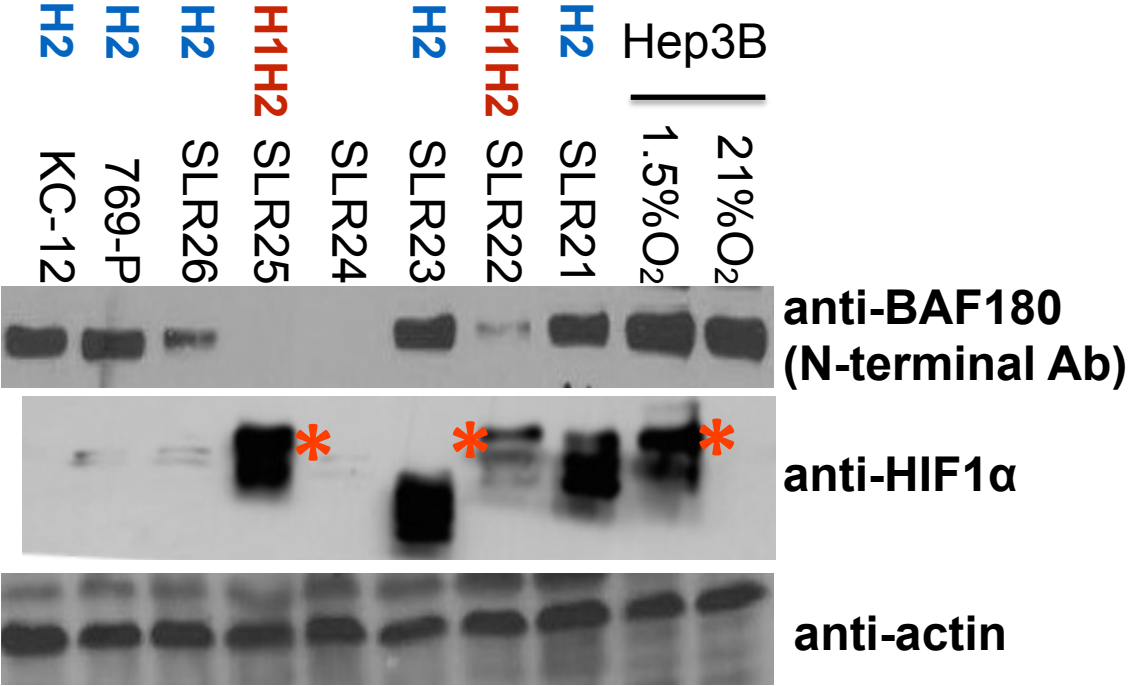

Supplement: oncsis201689x3.pdf [file oncsis201689x3.pdf]
